# Supplementary material
Source: Springer Nature journal article supplement (https://www.springermedizin.de/resource/supplementary/13099_2013_97_MOESM9_ESM.pdf/9665536)

Figure 6

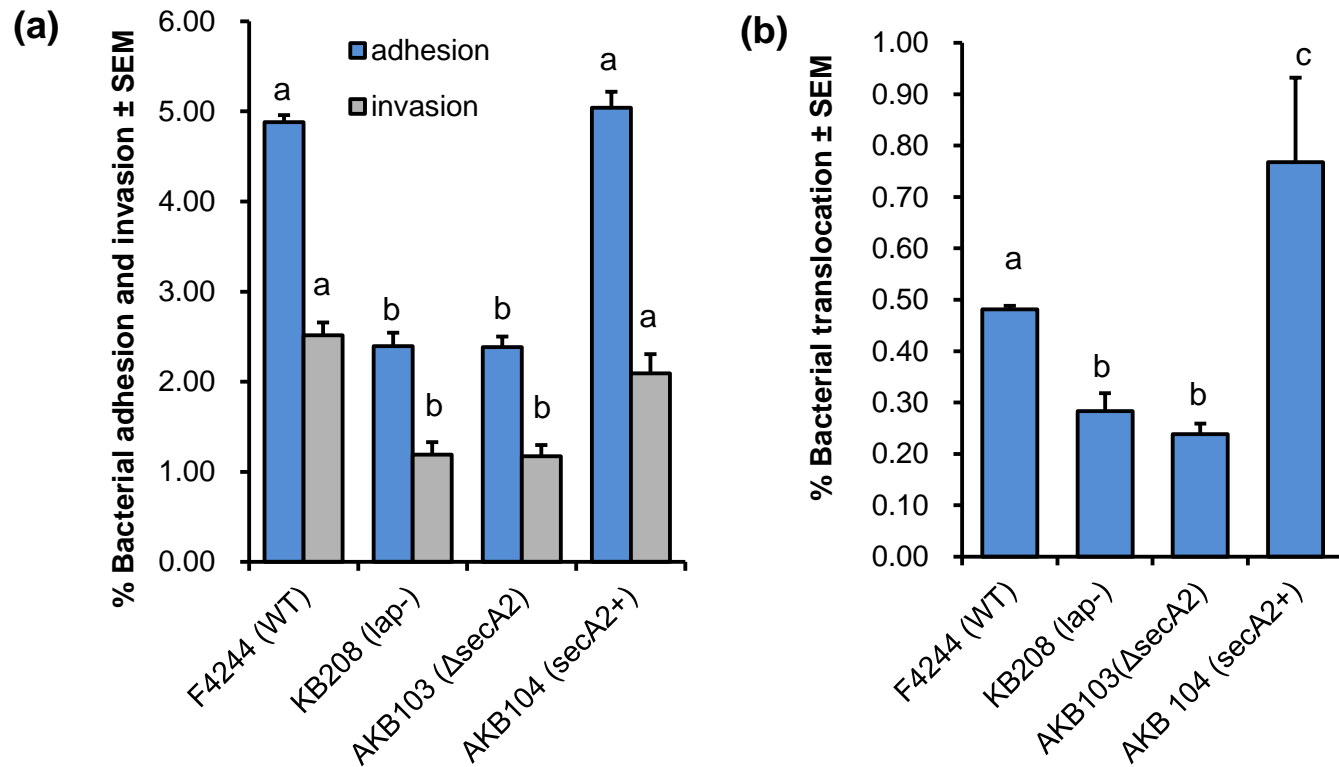

Supplement: MOESM9 [file 9665536]
